## The National COVID Cohort Collaborative: Clinical Characterization and Early Severity Prediction

Tellen D. Bennett MD\*<sup>1</sup>, Richard A. Moffitt PhD<sup>2</sup>, Janos G. Hajagos PhD<sup>3</sup>, Benjamin Amor PhD<sup>4</sup>, Adit Anand<sup>3</sup>, Mark M. Bissell<sup>4</sup>, Katie Rebecca Bradwell PhD<sup>4</sup>, Carolyn Bremer BS<sup>3</sup>, James Brian Byrd MD<sup>5</sup>, Alina Denham PhD<sup>6</sup>, Peter E. DeWitt PhD<sup>1</sup>, Davera Gabriel RN<sup>7</sup>, Brian T. Garibaldi MD<sup>7</sup>, Andrew T. Girvin PhD<sup>4</sup>, Justin Guinney PhD<sup>8</sup>, Elaine L. Hill PhD<sup>6</sup>, Stephanie S. Hong BS<sup>7</sup>, Hunter Jimenez BS<sup>3</sup>, Ramakanth Kavuluru PhD<sup>9</sup>, Kristin Kostka MPH<sup>10,11</sup>, Harold P. Lehmann MD<sup>7</sup>, Eli Levitt MS<sup>12</sup>, Sandeep K. Mallipattu MD<sup>3</sup>, Amin Manna MEng<sup>4</sup>, Julie A. McMurry MPH<sup>13</sup>, Michele Morris BA<sup>14</sup>, John Muschelli PhD<sup>7</sup>, Andrew J. Neumann MBA<sup>13</sup>, Matvey B. Palchuk MD<sup>15</sup>, Emily R. Pfaff PhD<sup>16</sup>, Zhenglong Qian<sup>17</sup>, Nabeel Qureshi BA<sup>4</sup>, Seth Russell MS<sup>1</sup>, Heidi Spratt PhD<sup>18</sup>, Anita Walden MS<sup>8,19</sup>, Andrew E. Williams PhD<sup>20</sup>, Jacob T. Wooldridge MD<sup>3</sup>, Yun Jae Yoo<sup>3</sup>, Xiaohan Tanner Zhang MD<sup>7</sup>, Richard L. Zhu MD<sup>7</sup>, Christopher P. Austin MD<sup>21</sup>, Joel H. Saltz MD<sup>2</sup>, Ken R. Gersing MD<sup>21</sup>, Melissa A. Haendel PhD<sup>19,22</sup>, Christopher G. Chute MD\*<sup>23</sup>, N3C Consortium<sup>+</sup>

### \*Corresponding Authors:

Tellen D. Bennett, University of Colorado School of Medicine, University of Colorado, Aurora, CO, USA

([tell.bennett@cuanschutz.edu](mailto:tell.bennett@cuanschutz.edu))

Christopher G. Chute, Johns Hopkins University, 2024 E Monument St, Baltimore, MD 21287, USA

([chute@jhu.edu](mailto:chute@jhu.edu))

+N3C Consortium author ICJME contributions are still being collected and will be provided at the proof stage for indexing in Medline.

1. Section of Informatics and Data Science, Department of Pediatrics, University of Colorado School of Medicine, University of Colorado, Aurora, CO, USA
2. Department of Biomedical Informatics, Stony Brook University, Stony Brook, NY, USA
3. Stony Brook University, Stony Brook, NY, USA
4. Palantir Technologies, Denver, CO, USA
5. The University of Michigan at Ann Arbor, Ann Arbor, MI, USA
6. University of Rochester Medical Center, Rochester, NY, USA
7. Johns Hopkins University School of Medicine, Baltimore, MD, USA
8. Sage Bionetworks, Seattle, WA, USA
9. University of Kentucky, Lexington, KY, USA
10. Real World Solutions, IQVIA, Cambridge, MA, USA
11. Observational Health Data Sciences and Informatics, New York, NY, USA
12. University of Alabama at Birmingham, Birmingham, AL, USA
13. Translational and Integrative Sciences Center, Oregon State University, Corvallis, OR, USA
14. Department of Biomedical Informatics, University of Pittsburgh, Pittsburgh, PA, USA
15. TriNetX, Cambridge, MA, USA
16. North Carolina Translational and Clinical Sciences Institute (NC TraCS), University of North Carolina at Chapel Hill, Chapel Hill, NC, USA
17. Stony Brook University, Stony Brook, NY, USA
18. University of Texas Medical Branch, Galveston, TX, USA
19. Oregon Clinical and Translational Research Institute, Oregon Health & Science University, Portland, OR, USA
20. Tufts Medical Center Clinical and Translational Science Institute, Tufts Medical Center, Boston, MA, USA
21. National Center for Advancing Translational Sciences, National Institutes of Health, Bethesda, MD, USA
22. Translational and Integrative Sciences Center, Dept. of Molecular Toxicology, Oregon State University, Corvallis, OR, USA
23. Schools of Medicine, Public Health, and Nursing, Johns Hopkins University, Baltimore, MD, USA

**Withdrawal Statement:** The authors have withdrawn this version of the manuscript to correct errors in Figure 1, Table 1, and Supplementary Table 1. Therefore, the authors do not wish this version of the work to be cited, please see version 2. If you have any questions, please contact the corresponding author.
